# Supplementary material for: Identifying Factors Influencing HIV Testing Behavior Among High- Risk Elderly Men: A Mixed-Methods Study Incorporating Structural Equation Modeling and Thematic Framework
Source: Research Square preprint supplement (doi:10.21203/rs.3.rs-7500496/v1), 2025-10-17
Supplement: Supplementary file 1 [file 27fe5beb05ffa2e66a0a7876.docx]

**Supplementary file: HIV_Testing_Determinants_Scale_IMB-SDT**

All items are answered on a 5-point Likert scale:
1 = Completely disagree, 2 = Some disagree, 3 = Neutral, 4 = Some agree, 5 = Completely agree

| **Dimension** | **Item Code** | **Questionnaire Item** |
| --- | --- | --- |
| **Autonomy** | A1 | HIV testing facilitates early diagnosis, and early diagnosis allows for effective treatment. |
| A2 | HIV testing enables timely awareness of one’s infection status, allowing protective measures to be taken early to prevent transmission to others. |
| A3 | I believe the HIV epidemic in my community is relatively severe. |
| A4 | Delaying testing may lead to a missed opportunity for timely diagnosis and treatment of HIV. |
| A5 | Delaying testing may result in unknowingly transmitting HIV to others. |
| A6 | Unprotected anal intercourse, multiple sexual partners, HIV-positive sexual partners, commercial sexual activity, sexually transmitted infections, and substance abuse are all risk factors for HIV infection. |
| A7 | HIV testing can provide a sense of certainty regarding one’s own health status. |
| A8 | Undergoing HIV testing is a responsible behavior toward oneself. |
| A9 | Undergoing HIV testing is a responsible behavior toward others. |
| A10 | HIV testing can reduce my anxiety about being infected with HIV. |
| **Competence** | C1 | Information on HIV testing is easily accessible. |
| C2 | I am aware of the proper procedural steps for HIV self-testing. |
| C3 | I understand the significance of the HIV “window period” when interpreting test results. |
| C4 | I can interpret HIV test results and know that if the test is positive, follow-up confirmatory testing should be pursued. |
| C5 | I am confident in my ability to find avenues to get tested for HIV. |
| C6 | I am able to independently decide whether or not to undergo HIV testing. |
| C7 | I would still undergo HIV testing even if there is a possibility of experiencing discrimination. |
| C8 | If I encounter problems during HIV testing, I am confident in my ability to seek professional medical advice. |
| C9 | In my community, the vast majority of people are afraid to get tested for HIV. |
| C10 | When friends talk about the importance of HIV testing, it prompts me to take the matter more seriously. |
| **Relatedness** | R1 | I have had, or heard of, discriminatory experiences when seeking testing at healthcare facilities, which makes me reluctant to seek testing. |
| R2 | Long waiting times at healthcare institutions or clinics discourage me from seeking testing. |
| R3 | I worry about personal privacy being disclosed or being seen by acquaintances, so I am reluctant to get tested. |
| R4 | The high cost of HIV self-testing kits prevents me from undergoing testing. |
| R5 | The complicated usage of HIV self-test kits deters me from testing. |
| R6 | I am unsure which channels are available for HIV testing. |
| R7 | I am not aware of accessible nearby testing sites, so I do not get tested. |
| R8 | My community provides sufficient services to support people whose HIV test results are positive. |
| R9 | If the test is positive, it is easy for me to get information about peer-support groups for follow-up referral. |
| R10 | I am concerned that I may be blamed or rejected by my spouse, family, or friends, so I am reluctant to get tested. |
